# Supplementary material for: Gridded global datasets for Gross Domestic Product and Human Development Index over 1990–2015
Source: PubMed Central journal article supplement (PMC5800392; doi:10.1038/sdata.2018.4), 2018-02-06
Supplement: sdata20184-s2.pdf [file sdata20184-s2.pdf]

**Supplement to**

Kummu et al

Gridded global datasets for Gross Domestic Product (GDP) and Human Development Index (HDI) over 1990-2015

Scientific Data

In this supplementary, the following information is provided:

Data sources are listed for the following data

National GDP per capita (PPP)

Sub-national GDP per capita (PPP)

National HDI

Sub-national HDI

Tabulated error estimates for interpolation and extrapolation

## National GDP per capita (PPP)

Majority of the national data is based on World Bank Development indicators database: <http://data.worldbank.org/data-catalog/world-development-indicators>

National GDP from other sources than World Bank development indicators database

Source: **CIA World Factbook (partly downloaded from <http://www.indexmundi.com>)** Trends from CIA World Factbook used to fill missing values at the start of the study period **EUROSTAT**

Countries: American Samoa  
Andorra  
Aruba  
British Virgin Islands  
Cayman Islands  
Falkland Islands (Malvinas)  
Faroe Islands  
French Polynesia  
Gibraltar  
Greenland  
Guam  
Guyana  
Isle of Man  
Korea, Dem. People's Rep.  
Liechtenstein  
Monaco  
Nauru  
New Caledonia  
Northern Mariana Islands  
San Marino  
Somalia  
St. Martin  
Taiwan, China  
Turks and Caicos Islands  
Virgin Islands (U.S.)  
Haiti  
Libya  
Maldives  
Qatar  
Sao Tome and Principe  
Réunion

**Sub-national GDP per capita (PPP)**

*Source for sub-national GDP:*

Gennaioli, N., La Porta, R., Lopez-de-Silanes, F., and Shleifer, A.: Human Capital and Regional Development, *The Quarterly Journal of Economics*, 128, 105-164, 10.1093/qje/qjs050, 2013.

## National HDI

*National HDI is based on UNDP Human Development Report*

UNDP: Human Development Reports database, United Nations Development Programme, 2016.

<http://hdr.undp.org/en/data>

For following non-UN member countries HDI data is based on:

Macau      Macau in Figures, 2016      [http://www.dsec.gov.mo/getAttachment/3fcdb33a-9238-44ca-8e4b-ebdb9c868e8e/E\\_MN\\_PUB\\_2016\\_Y.aspx](http://www.dsec.gov.mo/getAttachment/3fcdb33a-9238-44ca-8e4b-ebdb9c868e8e/E_MN_PUB_2016_Y.aspx)

Taiwan      Taiwan Directorate General of Budget <http://www.dgbas.gov.tw/public/Data/491716362790WG0X9I.pdf>

For other non-UN member countries, HDI based on old calculation method was used to scale the regional average HDI

Source:      Hastings (2009)      [https://web.archive.org/web/20111005100501/http://www.unescap.org/pdd/publications/workingpaper/wp\\_09\\_02.pdf](https://web.archive.org/web/20111005100501/http://www.unescap.org/pdd/publications/workingpaper/wp_09_02.pdf)

## Sub-national HDI

Sources to sub-national HDI can be divided into two: Eurostat and others

| Eurostat:      |          |      | Other:       |                                     |           |                                                                                                                                                                                                                                                           |
|----------------|----------|------|--------------|-------------------------------------|-----------|-----------------------------------------------------------------------------------------------------------------------------------------------------------------------------------------------------------------------------------------------------------|
| Country        | Source   | Year | Country      | Source                              | Year      | Link                                                                                                                                                                                                                                                      |
| Austria        | Eurostat | 2007 | Argentina    | UNDP                                | 2012      | <a href="http://research.omicsgroup.org/index.php/List_of_Argentine_provinces_by_Human_Development_Index">http://research.omicsgroup.org/index.php/List_of_Argentine_provinces_by_Human_Development_Index</a>                                             |
| Belgium        | Eurostat | 2007 | Australia    | Omicsgroup                          | N/A       | <a href="http://research.omicsgroup.org/index.php/List_of_Australian_states_and_territories_by_Human_Development_Index">http://research.omicsgroup.org/index.php/List_of_Australian_states_and_territories_by_Human_Development_Index</a>                 |
| Bulgaria       | Eurostat | 2007 | Brazil       | UNDP, with IPEA and FJP: Human D    | 2010      | <a href="http://research.omicsgroup.org/index.php/List_of_Brazilian_federative_units_by_Human_Development_Index">http://research.omicsgroup.org/index.php/List_of_Brazilian_federative_units_by_Human_Development_Index</a>                               |
| Czech Republic | Eurostat | 2007 | Canada       | Hazell et al (2012): The Human Dev  | 2011      | <a href="http://research.omicsgroup.org/index.php/List_of_Canadian_provinces_and_territories_by_Human_Development_Index">http://research.omicsgroup.org/index.php/List_of_Canadian_provinces_and_territories_by_Human_Development_Index</a>               |
| Denmark        | Eurostat | 2007 | Chile        | UNDP                                | 2003      | <a href="https://en.wikipedia.org/wiki/Ranked_lists_of_Chilean_regions#By_national_HDI">https://en.wikipedia.org/wiki/Ranked_lists_of_Chilean_regions#By_national_HDI</a>                                                                                 |
| Finland        | Eurostat | 2007 | China        | UNDP                                | 2014      | <a href="https://en.wikipedia.org/wiki/List_of_administrative_divisions_of_Greater_China_by_Human_Development_Index">https://en.wikipedia.org/wiki/List_of_administrative_divisions_of_Greater_China_by_Human_Development_Index</a>                       |
| France         | Eurostat | 2007 | El Salvador  | UNDP                                | 2008      | <a href="https://en.wikipedia.org/wiki/List_of_Salvadoran_Departments_by_Human_Development_Index">https://en.wikipedia.org/wiki/List_of_Salvadoran_Departments_by_Human_Development_Index</a>                                                             |
| Germany        | Eurostat | 2007 | India        | Sharma et al (2011) India Human D   | 2008      | <a href="https://en.wikipedia.org/wiki/List_of_Indian_states_and_territories_by_Human_Development_Index#cite_note-report2011-2">https://en.wikipedia.org/wiki/List_of_Indian_states_and_territories_by_Human_Development_Index#cite_note-report2011-2</a> |
| Greece         | Eurostat | 2007 | Indonesia    | Badan Pusat Statistik of Indonesia  | 2015      | <a href="https://en.wikipedia.org/wiki/List_of_Indonesian_provinces_by_Human_Development_Index">https://en.wikipedia.org/wiki/List_of_Indonesian_provinces_by_Human_Development_Index</a>                                                                 |
| Hungary        | Eurostat | 2007 | Japan        | Tashi Choden et al (2007) Gross Na  | 2000      | <a href="https://en.wikipedia.org/wiki/List_of_Japanese_prefectures_by_Human_Development_Index">https://en.wikipedia.org/wiki/List_of_Japanese_prefectures_by_Human_Development_Index</a>                                                                 |
| Ireland        | Eurostat | 2007 | Mexico       | UNDP (2010): El Indice de Desarroll | 2010      | <a href="http://research.omicsgroup.org/index.php/List_of_Mexican_states_by_Human_Development_Index">http://research.omicsgroup.org/index.php/List_of_Mexican_states_by_Human_Development_Index</a>                                                       |
| Italy          | Eurostat | 2007 | Pakistan     | SPDC research report                | 2012      | <a href="https://en.wikipedia.org/wiki/List_of_districts_of_Pakistan_by_Human_Development_Index">https://en.wikipedia.org/wiki/List_of_districts_of_Pakistan_by_Human_Development_Index</a>                                                               |
| Netherlands    | Eurostat | 2007 | Philippines  | Philippine Human Development Ne     | 2008/2009 | <a href="http://research.omicsgroup.org/index.php/List_of_Philippine_provinces_by_Human_Development_Index">http://research.omicsgroup.org/index.php/List_of_Philippine_provinces_by_Human_Development_Index</a>                                           |
| Norway         | Eurostat | 2007 | Russia       | UNDP                                | 2010      | <a href="https://en.wikipedia.org/wiki/List_of_federal_subjects_of_Russia_by_Human_Development_Index">https://en.wikipedia.org/wiki/List_of_federal_subjects_of_Russia_by_Human_Development_Index</a>                                                     |
| Poland         | Eurostat | 2007 | South Africa | UNDP                                | 2003      | <a href="http://research.omicsgroup.org/index.php/List_of_South_African_provinces_by_Human_Development_Index">http://research.omicsgroup.org/index.php/List_of_South_African_provinces_by_Human_Development_Index</a>                                     |
| Portugal       | Eurostat | 2007 | USA          | Originally from American Human D    | 2006      | <a href="http://mapscroll.blogspot.fi/2009/05/human-development-index-by-state.html">http://mapscroll.blogspot.fi/2009/05/human-development-index-by-state.html</a>                                                                                       |
| Romania        | Eurostat | 2007 | Venezuela    | Venezuelan National Institute of St | N/A       | <a href="http://research.omicsgroup.org/index.php/Ranked_list_of_Venezuelan_states#By_human_development_index">http://research.omicsgroup.org/index.php/Ranked_list_of_Venezuelan_states#By_human_development_index</a>                                   |
| Slovakia       | Eurostat | 2007 |              |                                     |           |                                                                                                                                                                                                                                                           |
| Slovenia       | Eurostat | 2007 |              |                                     |           |                                                                                                                                                                                                                                                           |
| Spain          | Eurostat | 2007 |              |                                     |           |                                                                                                                                                                                                                                                           |
| Sweden         | Eurostat | 2007 |              |                                     |           |                                                                                                                                                                                                                                                           |
| United Kingdom | Eurostat | 2007 |              |                                     |           |                                                                                                                                                                                                                                                           |

**ERROR ESTIMATES FOR INTERPOLATION AND EXTRAPOLATION - NATIONAL**

**GDP (PPP) per capita - Gross Domestic Product (PPP) per capita**

|                      | Distance from closest observed value (years) |       |        |        |        |        |        |        |        |        |        |        |        |        |        |        |        |        |        |        |        |        |        |
|----------------------|----------------------------------------------|-------|--------|--------|--------|--------|--------|--------|--------|--------|--------|--------|--------|--------|--------|--------|--------|--------|--------|--------|--------|--------|--------|
|                      | 1                                            | 2     | 3      | 4      | 5      | 6      | 7      | 8      | 9      | 10     | 11     | 12     | 13     | 14     | 15     | 16     | 17     | 18     | 19     | 20     | 21     | 22     | 23     |
| <b>INTERPOLATION</b> |                                              |       |        |        |        |        |        |        |        |        |        |        |        |        |        |        |        |        |        |        |        |        |        |
| high                 | 2.49%                                        | 3.56% | 6.01%  | 8.19%  | 10.13% | 11.66% | 13.09% | 14.70% | 16.10% | 17.95% | 21.57% |        |        |        |        |        |        |        |        |        |        |        |        |
| mean                 | 2.33%                                        | 3.49% | 5.89%  | 8.00%  | 9.87%  | 11.34% | 12.70% | 14.17% | 15.38% | 16.84% | 19.14% |        |        |        |        |        |        |        |        |        |        |        |        |
| low                  | 2.17%                                        | 3.42% | 5.76%  | 7.80%  | 9.61%  | 11.02% | 12.30% | 13.65% | 14.65% | 15.74% | 16.71% |        |        |        |        |        |        |        |        |        |        |        |        |
| <b>EXTRAPOLATION</b> |                                              |       |        |        |        |        |        |        |        |        |        |        |        |        |        |        |        |        |        |        |        |        |        |
| high                 | 4.24%                                        | 7.41% | 10.24% | 12.94% | 15.59% | 18.35% | 21.18% | 24.02% | 27.10% | 30.40% | 33.87% | 37.22% | 40.73% | 44.25% | 47.64% | 51.07% | 55.06% | 58.43% | 61.03% | 64.55% | 70.27% | 78.12% | 86.02% |
| mean                 | 4.05%                                        | 7.07% | 9.73%  | 12.22% | 14.60% | 16.98% | 19.36% | 21.70% | 24.14% | 26.64% | 29.20% | 31.66% | 34.15% | 36.51% | 38.87% | 41.22% | 43.87% | 45.96% | 47.47% | 49.20% | 51.62% | 53.92% | 53.74% |
| low                  | 3.85%                                        | 6.73% | 9.21%  | 11.50% | 13.62% | 15.61% | 17.54% | 19.37% | 21.19% | 22.89% | 24.53% | 26.11% | 27.57% | 28.77% | 30.10% | 31.38% | 32.68% | 33.49% | 33.90% | 33.85% | 32.96% | 29.72% | 21.47% |

**HDI - Human Development Index**

|                      | Distance from closest observed value (years) |       |       |       |       |       |       |       |       |       |       |       |       |       |       |       |       |       |       |       |       |       |       |
|----------------------|----------------------------------------------|-------|-------|-------|-------|-------|-------|-------|-------|-------|-------|-------|-------|-------|-------|-------|-------|-------|-------|-------|-------|-------|-------|
|                      | 1                                            | 2     | 3     | 4     | 5     | 6     | 7     | 8     | 9     | 10    | 11    | 12    | 13    | 14    | 15    | 16    | 17    | 18    | 19    | 20    | 21    | 22    | 23    |
| <b>EXTRAPOLATION</b> |                                              |       |       |       |       |       |       |       |       |       |       |       |       |       |       |       |       |       |       |       |       |       |       |
| high                 | 0.71%                                        | 1.25% | 1.75% | 2.23% | 2.69% | 3.14% | 3.57% | 3.99% | 4.39% | 4.77% | 5.13% | 5.51% | 5.85% | 6.20% | 6.56% | 6.94% | 7.32% | 7.70% | 8.03% | 8.29% | 8.61% | 8.93% | 9.59% |
| mean                 | 0.68%                                        | 1.19% | 1.67% | 2.12% | 2.57% | 2.99% | 3.40% | 3.79% | 4.16% | 4.51% | 4.83% | 5.17% | 5.47% | 5.78% | 6.09% | 6.41% | 6.72% | 7.02% | 7.26% | 7.44% | 7.62% | 7.74% | 7.91% |
| low                  | 0.65%                                        | 1.14% | 1.59% | 2.02% | 2.44% | 2.84% | 3.22% | 3.58% | 3.92% | 4.24% | 4.53% | 4.83% | 5.09% | 5.35% | 5.62% | 5.88% | 6.13% | 6.35% | 6.50% | 6.58% | 6.64% | 6.55% | 6.24% |

Note: for HDI no interpolation was needed; see main text.

*low - high values represents the 95% confidence interval*

**ERROR ESTIMATES FOR INTERPOLATION AND EXTRAPOLATION - SUB-NATIONAL**

**GDP (PPP) per capita - Gross Domestic Product (PPP) per capita**

|                      | Distance from closest observed value (years) |       |       |        |        |        |        |        |        |        |        |        |        |        |        |        |        |        |        |    |    |    |    |
|----------------------|----------------------------------------------|-------|-------|--------|--------|--------|--------|--------|--------|--------|--------|--------|--------|--------|--------|--------|--------|--------|--------|----|----|----|----|
|                      | 1                                            | 2     | 3     | 4      | 5      | 6      | 7      | 8      | 9      | 10     | 11     | 12     | 13     | 14     | 15     | 16     | 17     | 18     | 19     | 20 | 21 | 22 | 23 |
| <b>INTERPOLATION</b> |                                              |       |       |        |        |        |        |        |        |        |        |        |        |        |        |        |        |        |        |    |    |    |    |
| high                 | 3.72%                                        | 4.97% | 8.04% | 11.00% | 13.58% | 16.80% | 20.19% | 24.75% | 31.67% | 36.66% |        |        |        |        |        |        |        |        |        |    |    |    |    |
| mean                 | 3.51%                                        | 4.87% | 7.88% | 10.74% | 13.22% | 16.24% | 19.37% | 23.48% | 29.23% | 30.91% |        |        |        |        |        |        |        |        |        |    |    |    |    |
| low                  | 3.30%                                        | 4.78% | 7.72% | 10.48% | 12.85% | 15.69% | 18.54% | 22.21% | 26.80% | 25.16% |        |        |        |        |        |        |        |        |        |    |    |    |    |
| <b>EXTRAPOLATION</b> |                                              |       |       |        |        |        |        |        |        |        |        |        |        |        |        |        |        |        |        |    |    |    |    |
| high                 | 3.54%                                        | 5.29% | 6.63% | 7.70%  | 8.71%  | 9.70%  | 10.68% | 11.63% | 12.69% | 13.59% | 14.51% | 15.43% | 16.05% | 16.99% | 18.02% | 18.75% | 19.26% | 20.27% | 21.42% |    |    |    |    |
| mean                 | 3.32%                                        | 4.94% | 6.20% | 7.22%  | 8.16%  | 9.04%  | 9.90%  | 10.77% | 11.70% | 12.51% | 13.33% | 14.10% | 14.67% | 15.46% | 16.27% | 16.80% | 17.11% | 17.63% | 18.06% |    |    |    |    |
| low                  | 3.10%                                        | 4.59% | 5.77% | 6.74%  | 7.60%  | 8.38%  | 9.13%  | 9.91%  | 10.71% | 11.43% | 12.15% | 12.78% | 13.28% | 13.93% | 14.52% | 14.85% | 14.95% | 15.00% | 14.69% |    |    |    |    |

**HDI - Human Development Index**

|                      | Distance from closest observed value (years) |       |       |       |       |       |       |       |       |       |       |       |       |       |       |       |       |        |        |        |        |        |        |        |        |        |
|----------------------|----------------------------------------------|-------|-------|-------|-------|-------|-------|-------|-------|-------|-------|-------|-------|-------|-------|-------|-------|--------|--------|--------|--------|--------|--------|--------|--------|--------|
|                      | 1                                            | 2     | 3     | 4     | 5     | 6     | 7     | 8     | 9     | 10    | 11    | 12    | 13    | 14    | 15    | 16    | 17    | 18     | 19     | 20     | 21     | 22     | 23     | 24     | 25     | 26     |
| <b>EXTRAPOLATION</b> |                                              |       |       |       |       |       |       |       |       |       |       |       |       |       |       |       |       |        |        |        |        |        |        |        |        |        |
| high                 | 0.00%                                        | 0.05% | 0.22% | 0.46% | 0.77% | 1.14% | 1.59% | 2.09% | 2.67% | 3.32% | 4.03% | 4.81% | 5.65% | 6.56% | 7.55% | 8.59% | 9.71% | 10.89% | 12.14% | 13.46% | 14.84% | 16.30% | 17.82% | 19.40% | 21.06% | 22.78% |
| mean                 | 0.00%                                        | 0.01% | 0.13% | 0.30% | 0.52% | 0.81% | 1.15% | 1.54% | 1.99% | 2.50% | 3.07% | 3.68% | 4.36% | 5.09% | 5.88% | 6.72% | 7.62% | 8.57%  | 9.58%  | 10.65% | 11.77% | 12.95% | 14.18% | 15.47% | 16.82% | 18.22% |
| low                  | 0.00%                                        | 0.00% | 0.03% | 0.13% | 0.28% | 0.47% | 0.71% | 0.99% | 1.32% | 1.69% | 2.10% | 2.56% | 3.07% | 3.61% | 4.21% | 4.84% | 5.53% | 6.25%  | 7.02%  | 7.84%  | 8.69%  | 9.60%  | 10.55% | 11.54% | 12.57% | 13.66% |

Note: for HDI no interpolation was needed; see main text.

*low - high values represents the 95% confidence interval*
